**Title: River phosphorus cycling constrains lake cyanobacteria blooms**

**Authors:** Whitney M. King<sup>1†</sup>, Susan E. Curless<sup>1</sup>, James M. Hood<sup>1,3\*†</sup>

**Affiliations:**

5 <sup>1</sup>Aquatic Ecology Laboratory, Department of Evolution, Ecology, and Organismal Behavior, The Ohio State University, Columbus, OH, USA.

<sup>3</sup>Translational Data Analytics Institute, The Ohio State University, Columbus, OH, USA.

\*Corresponding author: hood.211@osu.edu

†Authors contributed equally to this work

10

**Abstract:**

Bioavailable phosphorus exports from rivers during high flow often fuel downstream harmful cyanobacterial blooms; yet whether river phosphorus cycles affect these exports is unclear. Here, we examined river phosphorus cycling during high flow events in a large agricultural watershed that drives cyanobacterial blooms in Lake Erie. We show that between 2003 and 2019 river phosphorus cycles, through phosphorus sorption, reduced bioavailable phosphorus exports by 24%, potentially constraining Lake Erie cyanobacterial blooms by 61%. Over the last 45-years, phosphorus sorption has declined with suspended sediment exports due to increases in soil-erosion-minimizing agricultural practices, likely contributing to recent cyanobacterial blooms. In this, and likely other agricultural watersheds, rivers perform an unrecognized ecosystem service during high flow creating field-river-lake linkages that need to be incorporated into phosphorus management.

15  
20

## Main Text

25 Cyanobacterial harmful blooms (cyanoHABs), which have been increasing worldwide,  
negatively impact freshwater ecosystems, human livelihoods, and human health (1, 2). One  
primary cause of cyanoHABs are phosphorus (P) losses from agricultural production,  
particularly the loss of dissolved reactive P (DRP) which is far more bioavailable to  
cyanobacteria than sediment P (3). Thus, it is a global environmental priority to understand and  
30 reduce watershed P exports (4). Yet, P management is complicated by uncertainty associated  
with P retention and transformation during downstream transport through river networks (5,  
6). In streams and rivers, biogeochemical processes alter the magnitude and bioavailability (i.e.,  
DRP versus sediment P) of P transported downstream exerting controls on P exports to recipient  
water bodies during low flows (7). Yet, P and suspended sediment concentrations increase with  
35 discharge and most P and sediment export occurs at high flows (8-10). Yet, we know little about  
P cycling during high flows (7, 11); constraining our ability to successfully manage P pollution  
and cyanoHABs.

One potentially important aspect of river P cycling during high flows is the abiotic  
process of P sorption-desorption by suspended sediment particles, which can increase or  
40 decrease DRP concentrations and, therefore, the bioavailability of P exports to cyanoHABs. P  
sorption-desorption during high flows, which is rarely quantified, is perceived to be unimportant  
at the watershed scale because the rapid downstream transport limits the time for sorption-  
desorption to influence DRP exports (Fig. 1a) (7, 12). Yet, in many river systems rainfall driven  
surface water runoff travels hours to days from catchment headwater streams to recipient water  
45 bodies (13, 14), allowing sufficient time for P sorption-desorption to influence DRP exports (15).  
Unfortunately, it is unknown how much P sorption-desorption affects DRP exports during high  
flows and, thus, subsequently mediates cyanoHABs in recipient ecosystems.

Our poor understanding of P cycling during high flows may mask an important watershed-scale process that could mediate the influence of agricultural practices on cyanoHABs, complicating P management (5, 6). During high flows, the magnitude of P sorption-desorption is likely determined by DRP concentrations, suspended sediment concentration, and river discharge (16, 17). These factors control the magnitude of P sorption-desorption in a volume of river water and ultimately, in conjunction with hydrologic travel time, the total net P sorption-desorption within a river network. Thus, controls on these factors (e.g., climate or agricultural management practices) impact the magnitude and direction of P sorption-desorption (18, 19) and the bioavailability of exports to recipient ecosystems.

Here, we examined the influence of P sorption-desorption during high flows on DRP exports and cyanoHABs. We hypothesized that during high flow, suspended sediment concentration shapes the magnitude of P sorption-desorption at the watershed scale altering the bioavailability of P exports and ultimately cyanoHABs severity in recipient ecosystems. We evaluated this hypothesis by measuring the magnitude and controls of P sorption-desorption by suspended sediment during high flow events. Then, we scaled up those processes to the tributary and river network level to estimate the impact of P sorption-desorption on cyanoHABs in Lake Erie.

### **P sorption in tributaries**

We tested our hypothesis in the agricultural-dominated Maumee River watershed which drains into Lake Erie. DRP exports between March and June from the Maumee watershed are primarily responsible for the severity of reoccurring Lake Erie cyanoHABs (3, 20, 21). We focus on a March–June window, as opposed to the March–July window used in many cyanoHABs forecast models (22, 23), because it overlaps with our high flow sampling and represents the majority of

March–July DRP loads (Fig. S1). On average, 77% of Maumee River March–June DRP exports occur during high flows (<25% flow exceedance). Thus, P sorption-desorption by suspended sediment during high flow events could shape DRP exports to Lake Erie and cyanoHABs.

75 To better understand the influence of P cycling on DRP exports during high flow events, we measured three parameters that combine to determine the ecosystem level impact of P sorption-desorption: P sorption-desorption, equilibrium P concentration ( $EPC_0$ ), and P sorption capacity.  $EPC_0$  is the DRP concentration separating P sorption ( $DRP > EPC_0$ ) and desorption ( $DRP < EPC_0$ ) and predicts whether suspended sediment are a P source (desorption) or sink  
80 (sorption). P sorption capacity reflects the total P mass suspended sediment particles can sorb. In six tributaries of the Maumee River (Ohio, USA; Fig. S2; Table S1), we sampled 13 storm events between January and June 2019 (Fig. S3). Eighty-six percent of our samples were collected during high flows (i.e., Fig. S4).

Suspended sediment sorbed P in 98% of our measurements (77 of 78 samples;  $DRP > EPC_0$ ), although P sorption rates varied from 0.001 to 72.5 mg P m<sup>-3</sup> h<sup>-1</sup>. Sorption rates varied among streams and increased with suspended sediment concentrations ( $R^2 = 0.81$ , p-value < 0.001; Fig. 2; Table S2) and discharge ( $R^2 = 0.69$ , p-value < 0.001), which were strongly correlated ( $r = 0.64$ ).

Our results indicate that the 40% reductions in spring DRP load required by a binational  
90 P management agreement (22), would likely not alter DRP source-sink dynamics in these tributaries during high flow. Tributary DRP concentrations during high flow averaged ~800% higher than  $EPC_0$  indicating that a 40% reduction in DRP concentration would likely not lead to P desorption by suspended sediment. Furthermore,  $EPC_0$  increased with DRP concentrations with a positive intercept and slope ( $R^2 = 0.48$ , p-value < 0.001; Fig. S5) indicating that declines  
95 in DRP concentrations might lower  $EPC_0$  but not alter P source-sink dynamics.

## **Tributary P sorption decreases DRP exports**

To estimate P sorption in tributaries, we combined P sorption parameters with discharge, DRP, and suspended sediment data from three tributaries with sufficient DRP and suspended sediment data. We focused on high flow events between March and June 2019. We estimated the magnitude of P sorption by suspended sediment exported from these tributaries in four steps. First, we calculated the potential mass-specific P sorption as the P sorbed per gram suspended sediment during transport between the tributaries and the furthest downstream Maumee River monitoring station (Waterville, OH; 26 km from Lake Erie; Fig. S2). Next, we constrained P sorption to not exceed the maximum capacity of suspended sediment to bind P (P sorption capacity). Then, we calculated total P sorption as the product of mass-specific sorption rates and suspended sediment loads. We constrained total P sorption so that it could not decrease DRP concentrations below the threshold at which sediment switch from a P sink to a source (i.e., EPC<sub>0</sub>). Finally, we integrated total P sorption across March–June high flow events during 2019.

Tributary P sorption substantially reduced DRP exports resulting in a significant and, until now, unrecognized ecosystem service. Suspended sediment in these tributaries sorbed 31 – 45% of observed DRP exports (0.1–0.2 tons P; Fig. 3a).

Daily tributary P sorption increased with discharge and DRP loads (Fig. 3b) as well as suspended sediment loads (not shown); three tightly linked exports from agricultural watersheds. As a result, the daily percent of DRP exports sorbed increased from ~10% to 50% with discharge (Fig. 3b). Sediment P sorption saturated before the sediment had traveled an average of 14.7 km, 11 to 55% of the distance to the downstream Maumee River monitoring station (Fig. 3c). Thus, P sorption reactions reached equilibrium well before sediment were exported from the Maumee

watershed, indicating that suspended sediment originating from most of the Maumee watershed  
120 have ample time during transport to shape DRP exports.

### **P sorption constrains Lake Erie cyanoHABs**

To investigate the effect of P sorption within the Maumee River network on Lake Erie DRP  
loads and cyanoHABs, we combined our sorption measurements with 1975 to 2019 discharge  
125 and water quality data from the Maumee River monitoring station at Waterville, OH (Fig. S2;  
Table S1). We estimated P sorption within the Maumee River system by combining data on  
Maumee River suspended sediment loads and watershed-scale mass-specific sorption rates from  
the tributaries. Our assumption that P sorption by suspended sediment did not change  
substantially between 1975 and 2019 is supported by comparison of recent (Fig. 2) (Fig. 2; 24)  
130 and older (i.e., 1978 (25, 26)) research indicating that suspended sediment is enriched in P  
relative to agricultural soils, sorbed P during high flows, and had similar P bioavailability (3).  
Here, we integrate all estimates for each year across March–June high flow events; all  
subsequent measurements focus on this window.

During March–June high flow events, suspended sediment sorbed 17.4 – 164.8 tons P per  
135 year or 20–342% of observed DRP loads, decreasing the bioavailability of total P loads to Lake  
Erie and likely constraining cyanoHABs severity (Fig. 1b, Fig. 4a and 4b). This conservative  
estimate does not include P sorption by suspended sediment retained and buried in the river  
system or its floodplain. The percent of DRP sorbed was 2.8-fold higher before than after 2003  
( $< 2003 = 91\% \pm 0.75\%$ ;  $\geq 2003 = 33\% \pm 0.08\%$ ; Fig. 4b), a threshold year for increased flow,  
140 DRP loading, and cyanoHABs in Lake Erie (21, 27).

Thus, in support of our hypothesis, P sorption substantially reduces DRP loading to Lake  
Erie, reducing the bioavailability of total P loads. DRP is entirely bioavailable to cyanoHABs,

whereas, only ~26% of Maumee River suspended sediment P is bioavailable (3). Furthermore, in this system, immobilization of DRP onto suspended sediment currently represents a long-term P sink because ~70% of sediment exports are buried near the Maumee River mouth (28) where bottom sediment have low internal P loading (29).

Our results indicate that P sorption in the Maumee watershed performs an unrecognized ecosystem service that constrained cyanoHABs and the resulting ecological, economic, and human health consequences. To estimate the effect of P sorption on cyanoHABs, we predicted (following Stumpf et al. (21)) the maximum annual cyanobacteria density in Lake Erie for each year between 2003 and 2019 using March-June DRP loads during high flows estimated with and without P sorption in the river. Without P sorption, the maximum annual cyanobacteria density would be 2.6-fold higher (Fig 4c). Cyanobacteria density estimates in the absence of P sorption during some years were 400% higher than observed in Lake Erie since 2003. While nitrogen or light limitation might keep cyanobacteria from reaching these densities (30), riverine P cycles clearly reduce the bioavailability of P exports to Lake Erie and serve as a substantial and previously unknown constraint on cyanoHABs.

Our results indicate that, after accounting for discharge, recent increases in DRP exports to Lake Erie from the Maumee River can be explained by declines in P sorption, driven by declines in suspended sediment loads. After accounting for variation in discharge, which has been increasing for the last 25 years (Fig. S6a, also see (31)), Maumee River March–June suspended sediment loads have declined between 1975 and 2019 ( $P_{\text{year}} < 0.001$ ;  $R^2 = 0.672$ ; Fig. S6b; also see (31)). Declines in suspended sediment loads are likely due to changes in agricultural practices that reduce erosion such as the use of cover crops, no-till cropping systems, and tile drains (27, 32). Between 1975 and 2019, March–June suspended sediment loads at high discharge ( $4000 \text{ m}^3 \times 10^6$ ) have declined by 48% or 120 kilotons dry mass per decade, resulting

in a 48% decline in P sorption (20 tons P per decade). To examine how declines in suspended sediment loads and P sorption contributed to differences in DRP loads before and after 2003, we estimated DRP loads in the absence of historic declines in suspended sediment loads. After accounting for P sorption not occurring due to changes in suspended sediment loads, DRP load – discharge relationships were similar before and after 2003 ( $P = 0.26$ ;  $R^2 = 0.65$ , Fig. 4d; Table S4).

Thus, recent increases in DRP loads to Lake Erie can be attributed to both increasing discharge and a decline in P sorption associated with declining suspended sediment loads. The impact of other mechanisms for increased DRP loading (e.g., soil stratification, macropores, legacy P, or tile drains) are not well supported empirically at the watershed scale (27, 33), but likely also contribute to patterns in discharge and DRP loads. Our results clarify the role stream and river P cycles play in controlling linkages among climate, agricultural practices, and downstream water quality (Fig. 1b).

Climate change may have unanticipated effects on the role river P cycles play in watershed nutrient budgets. In the Maumee watershed, climate change, which is predicted to increase spring precipitation by up to 20% by 2100 (34), could increase river discharge (35) (but see (36)) likely leading to more erosion, higher suspended sediment loads, and more P sorption; potentially decreasing the bioavailability of P loads to Lake Erie. However, the cumulative impact of river P cycling on cyanoHABs will depend upon the impact of rivers on the bioavailability of P exports (Fig. 1b) as well as other climate impacts on agricultural fields and internal P loading in western Lake Erie. While benthic sediment in western Lake Erie currently is a long-term P sink (29), changes in water temperature could flip this P sink to a source (37).

## Implications for P management



Here, we identify a critical ecosystem service –river P cycling during high flows (Fig. 1b)– that, with changing agricultural practices and climate, helps explain the proliferation of cyanoHABs in Lake Erie and perhaps worldwide. Our findings are broadly applicable to other watersheds with intensive agricultural land use (6, 38). Phosphorus sorption-desorption is likely important during high flows in river basins with headwater to lake travel times greater than 12 hours (13, 14, 39). In many of these river basins, suspended sediment loads have declined over the last 50 years (e.g., Mississippi, Ohio, Yangtze, and Yellow rivers), due to changes in climate, reservoir impoundment, and agricultural practices (40-42). Yet, depending upon whether suspended sediment sorb or release P (an expanding DRP arrow in Fig. 1b), riverine P cycles could enhance or mitigate cyanoHAB severity. Because riverine processes can play a central role in watershed P budgets, as also shown for river carbon and nitrogen cycles (43, 44), these processes must be considered as a part of cyanoHAB mitigation and management.

Unfortunately, the role of riverine processes in shaping P exports is rarely considered in watershed scale P studies, watershed models, or P management (6, 45, 46). Our work on P cycling during high flows, contributes to numerous low-flow studies demonstrating how river P cycles can alter the magnitude and bioavailability of P exports (7, 47). Failing to consider the contribution of river P cycles to downstream exports can result in a misattribution of P sources or sinks to the wrong location or mechanism (Fig. 1). Thus, not including rivers in watershed models and P management ignores an important watershed scale process influencing the bioavailability of P loads and cyanoHABs in recipient ecosystems.

Our research also contributes to our growing understanding of the consequences of managing for a single stressor or constituent (48, 49). We demonstrate that while efforts to reduce sediment erosion in the Maumee River watershed were successful, declines in suspended sediment loads contributed to increases in the bioavailability of P loads and likely cyanoHABs. Our results do

215 not indicate that efforts to reduce erosion and sedimentation should be halted. Such practices  
provide benefits to agricultural systems (19) and reduce sediment pollution in freshwater  
ecosystems (50). Instead, our research emphasizes the need to simultaneously consider multiple  
stressors with a watershed-scale approach (38). This approach considers and addresses potential  
unanticipated consequences which could undermine management, waste conservation funds, and  
220 erode public trust.

## References and Notes

1. H. W. Paerl *et al.*, Mitigating cyanobacterial harmful algal blooms in aquatic ecosystems  
225 impacted by climate change and anthropogenic nutrients. *Harmful Algae* **54**, 213-222  
(2016).
2. C. R. C. Kouakou, T. G. Poder, Economic impact of harmful algal blooms on human  
health: a systematic review. *J Water Health* **17**, 499-516 (2019).
3. D. B. Baker *et al.*, Phosphorus loading to Lake Erie from the Maumee, Sandusky and  
230 Cuyahoga rivers: The importance of bioavailability. *Journal of Great Lakes Research* **40**,  
502-517 (2014).
4. P. Glibert, M. Burford, Globally Changing Nutrient Loads and Harmful Algal Blooms:  
Recent Advances, New Paradigms, and Continuing Challenges. *Oceanography* **30**, 58-69  
(2017).
- 235 5. A. N. Sharpley, P. J. Kleinman, P. Jordan, L. Bergstrom, A. L. Allen, Evaluating the  
success of phosphorus management from field to watershed. *J Environ Qual* **38**, 1981-  
1988 (2009).
6. H. P. Jarvie *et al.*, Phosphorus mitigation to control river eutrophication: murky waters,  
inconvenient truths, and "postnormal" science. *Journal of Environmental Quality* **42**,  
240 295-304 (2013).
7. P. J. Withers, H. P. Jarvie, Delivery and cycling of phosphorus in rivers: a review.  
*Science of the Total Environment* **400**, 379-395 (2008).
8. D. L. Correll, T. E. Jordan, D. E. Weller, Transport of nitrogen and phosphorus from  
Rhode River watersheds during storm events. *Water Resources Research* **35**, 2513-2521  
245 (1999).

9. L. E. Gentry, M. B. David, T. V. Royer, C. A. Mitchell, K. M. Starks, Phosphorus transport pathways to streams in tile-drained agricultural watersheds. *J Environ Qual* **36**, 408-415 (2007).
10. A. N. Sharpley *et al.*, Phosphorus loss from an agricultural watershed as a function of storm size. *Journal of Environmental Quality* **37**, 362-368 (2008).
11. A. C. Edwards, P. J. A. Withers, Transport and delivery of suspended solids, nitrogen and phosphorus from various sources to freshwaters in the UK. *Journal of Hydrology* **350**, 144-153 (2008).
12. P. A. Bukaveckas, Effects of channel restoration on water velocity, transient storage, and nutrient uptake in a channelized stream. *Environmental Science and Technology* **41**, 1570-1576 (2007).
13. F. H. Verhoff, D. A. Melfi, S. M. Yaksich, Storm travel distance calculations for total phosphorus and suspended materials in rivers. *Water Resources Research* **15**, 1354-1360 (1979).
14. H. E. Jobson, Predicting travel time and dispersion in rivers and streams. *Journal of Hydraulic Engineering* **123**, 971-978 (1997).
15. B. Zhang *et al.*, Phosphorus fractions and phosphate sorption-release characteristics relevant to the soil composition of water-level-fluctuating zone of Three Gorges Reservoir. *Ecological Engineering* **40**, 153-159 (2012).
16. A. Zhou, H. Tang, D. Wang, Phosphorus adsorption on natural sediments: modeling and effects of pH and sediment composition. *Water Res* **39**, 1245-1254 (2005).
17. J. Z. Zhang, X. L. Huang, Relative importance of solid-phase phosphorus and iron on sorption behavior and sediments. *Environmental Science and Technology* **41**, 2789-2795 (2007).

- 270 18. S. Daryanto, L. Wang, P. A. Jacinthe, Meta-analysis of phosphorus loss from no-till soils. *J Environ Qual* **46**, 1028-1037 (2017).
19. D. L. Osmond, A. L. Shober, A. N. Sharpley, E. W. Duncan, D. L. K. Hoag, Increasing the effectiveness and adoption of agricultural phosphorus management strategies to minimize water quality impairment. *J Environ Qual* **48**, 1204-1217 (2019).
- 275 20. A. M. Michalak *et al.*, Record-setting algal bloom in Lake Erie caused by agricultural and meteorological trends consistent with expected future conditions. *Proceedings of the National Academy of Sciences U S A* **110**, 6448-6452 (2013).
21. R. P. Stumpf, L. T. Johnson, T. T. Wynne, D. B. Baker, Forecasting annual cyanobacterial bloom biomass to inform management decisions in Lake Erie. *Journal of Great Lakes Research* **42**, 1174-1183 (2016).
- 280 22. *Recommended phosphorus loading targets for Lake Erie. Final Report of the Annex 4 Objectives and Targets Task Team, May 11, 2015* (<https://www.epa.gov/sites/production/files/2015-06/documents/report-recommended-phosphorus-loading-targets-lake-erie-201505.pdf>).
- 285 23. D. Scavia, J. V. DePinto, I. Bertani, A multi-model approach to evaluating target phosphorus loads for Lake Erie. *Journal of Great Lakes Research* **42**, 1139-1150 (2016).
24. T. N. Williamson, E. G. Dobrowolski, A. C. Gellis, T. Sabitov, L. Gorman Sanisaca, Monthly suspended-sediment apportionment for a western Lake Erie agricultural tributary. *Journal of Great Lakes Research*, (2020).
- 290 25. D. B. Green, T. J. Logan, N. E. Smeck, Phosphate adsorption-desorption characteristics of suspended sediments in the Maumee River Basin of Ohio. *Journal of Environmental Quality* **7**, 208-212 (1978).

26. D. L. McCallister, T. J. Logan, Phosphate adsorption-desorption characteristics of soils and bottom sediments in the Maumee River Basin of Ohio. *Journal of Environmental Quality* **7**, 87-92 (1978).  
295
27. H. P. Jarvie *et al.*, Increased soluble phosphorus loads to Lake Erie: unintended consequences of conservation practices? *Journal of Environmental Quality* **46**, 123-132 (2017).
28. D. B. Baker *et al.*, Lagrangian analysis of the transport and processing of agricultural runoff in the lower Maumee River and Maumee Bay. *Journal of Great Lakes Research* **40**, 479-495 (2014).  
300
29. G. Matisoff *et al.*, Internal loading of phosphorus in western Lake Erie. *Journal of Great Lakes Research* **42**, 775-788 (2016).
30. J. D. Chaffin, T. W. Davis, D. J. Smith, M. M. Baer, G. J. Dick, Interactions between nitrogen form, loading rate, and light intensity on *Microcystis* and *Planktothrix* growth and microcystin production. *Harmful Algae* **73**, 84-97 (2018).  
305
31. C. A. Stow, Y. Cha, L. T. Johnson, R. Confesor, R. P. Richards, Long-term and seasonal trend decomposition of Maumee River nutrient inputs to western Lake Erie. *Environ Sci Technol* **49**, 3392-3400 (2015).
32. R. P. Richards, D. B. Baker, J. P. Crumrine, Improved water quality in Ohio tributaries to Lake Erie: A consequence of conservation practices. *Journal of Soil and Water Conservation* **64**, 200-211 (2009).  
310
33. D. R. Smith *et al.*, Lake Erie, phosphorus, and microcystin: Is it really the farmer's fault? *Journal of Soil and Water Conservation* **73**, 48-57 (2018).

- 315 34. K. Hayhoe, J. VanDorn, T. Croley, N. Schlegal, D. Wuebbles, Regional climate change  
projections for Chicago and the U.S. Great Lakes. *Journal of Great Lakes Research* **36**,  
7-21 (2010).
35. N. S. Bosch, M. A. Evans, D. Scavia, J. D. Allan, Interacting effects of climate change  
and agricultural BMPs on nutrient runoff entering Lake Erie. *Journal of Great Lakes*  
320 *Research* **40**, 581-589 (2014).
36. M. M. Kalcic *et al.*, Climate Change and Nutrient Loading in the Western Lake Erie  
Basin: Warming Can Counteract a Wetter Future. *Environ Sci Technol* **53**, 7543-7550  
(2019).
37. K. J. Gibbons, T. B. Bridgeman, Effect of temperature on phosphorus flux from anoxic  
325 western Lake Erie sediments. *Water Res* **182**, 116022 (2020).
38. R. M. Kreiling, M. C. Thoms, W. B. Richardson, Beyond the edge: linking agricultural  
landscapes, stream networks, and best management practices. *Journal of Environmental*  
*Quality* **47**, 42-53 (2018).
39. F. Worrall, N. J. K. Howden, T. P. Burt, A method of estimating in-stream residence time  
330 of water in rivers. *Journal of Hydrology* **512**, 274-284 (2014).
40. X. X. Lu *et al.*, Sediment loads response to climate change: A preliminary study of eight  
large Chinese rivers. *International Journal of Sediment Research* **28**, 1-14 (2013).
41. R. H. Meade, J. A. Moody, Causes for the decline of suspended-sediment discharge in the  
Mississippi River system, 1940-2007. *Hydrological Processes*, n/a-n/a (2009).
- 335 42. S. V. Mize, J. C. Murphy, T. H. Diehl, D. K. Demcheck, Suspended-sediment  
concentrations and loads in the lower Mississippi and Atchafalaya rivers decreased by  
half between 1980 and 2015. *Journal of Hydrology* **564**, 1-11 (2018).

43. B. J. Peterson *et al.*, Controls of nitrogen export from watersheds by headwater streams. *Science* **292**, 86-90 (2001).
- 340 44. P. A. Raymond *et al.*, Global carbon dioxide emissions from inland waters. *Nature* **503**, 355-359 (2013).
45. H. P. Jarvie *et al.*, Within-river phosphorus retention: accounting for a missing piece in the watershed phosphorus puzzle. *Environ Sci Technol* **46**, 13284-13292 (2012).
46. M. J. White *et al.*, Development and testing of an in-stream phosphorus cycling model for  
345 the Soil and Water Assessment Tool. *Journal of Environmental Quality* **43**, 215-223 (2014).
47. H. P. Jarvie *et al.*, Quantifying phosphorus retention and release in rivers and watersheds using extended end-member mixing analysis (E-EMMA). *Journal of Environmental Quality* **40**, 492-504 (2011).
- 350 48. H. W. Paerl *et al.*, It Takes Two to Tango: When and Where Dual Nutrient (N & P) Reductions Are Needed to Protect Lakes and Downstream Ecosystems. *Environmental Science & Technology* **50**, 10805-10813 (2016).
49. J. C. Finlay, G. E. Small, R. W. Sterner, Human influences on nitrogen removal in lakes. *Science* **342**, 247-250 (2013).
- 355 50. K. L. Blann, J. L. Anderson, G. R. Sands, B. Vondracek, Effects of agricultural drainage on aquatic ecosystems: a review. *Critical Reviews in Environmental Science and Technology* **39**, 909-1001 (2009).
51. Ohio EPA, *Nutrient mass balance study for Ohio's major rivers*. Ohio Environmental Protection Agency Division of Surface Water, Ed., (Ohio Environmental Protection Agency Division of Surface Water,, Columbus, OH, 2018).
- 360



52. J. D. H. Strickland, T. R. Parsons, *A practical handbook of seawater analysis*. (Fisheries Research Board of Canada, Ottawa, 1972).
53. H. P. Jarvie *et al.*, Role of river bed sediments as sources and sinks of phosphorus across two major eutrophic UK river basins: the Hampshire Avon and Herefordshire Wye. *Journal of Hydrology* **304**, 51-74 (2005).
- 365
54. D. Y. F. Lai, K. C. Lam, Phosphorus sorption by sediments in a subtropical constructed wetland receiving stormwater runoff. *Ecological Engineering* **35**, 735-743 (2009).
55. P. N. Froelich, Kinetic control of dissolved phosphate in natural rivers and estuaries: A primer on the phosphate buffer mechanism. *Limnology and Oceanography* **33**, 649-668  
370 (1988).
56. U.S. Geological Survey [USGS]. (2021), vol. 2021.
57. G. Fouad, A. Skupin, C. L. Tague, Regional regression models of percentile flows for the contiguous US: Expert versus data-driven independent variable selection. *Hydrology and Earth System Sciences*, (2016).
- 375
58. H. U. National Center for Water Quality Research. (2020).
59. S. N. Wood, *Generalized additive models: an introduction with R*. (Taylor & Francis, Boca Raton, FL USA, 2006).
60. S. N. Wood. (R Core Team 2017, 2019).
61. R Core Team. (R Foundation for Statistical Computing, Vienna, Austria, 2020).
- 380
62. J. Du, H. Xie, Y. Hu, Y. Xu, C.-y. Xu, Development and testing of a new storm runoff routing approach based on time variant spatially distributed travel time method. *Journal of Hydrology* **369**, 44-54 (2009).
63. H. H. Barnes, Jr., , *Roughness characteristics of natural channels*. U. S. G. Survey, Ed., (U.S. Geological Survey, Denver, CO, 1967).

- 385      64.      K. P. Burnham, D. R. Anderson, *Model selection and multimodel inference: A practical information-theoretic approach*. (Springer, New York, ed. 2nd Edition, 2002).
65.      D. I. Warton, R. A. Duursma, D. S. Falster, S. Taskinen, smatr 3 - an R package for estimate and inference about allometric lines. *Methods in Ecology and Evolution* **3**, 257-259 (2012).
- 390      66.      R. L. Wasserstein, A. L. Schirm, N. A. Lazar, Moving to a World Beyond “ $p < 0.05$ ”. *The American Statistician* **73**, 1-19 (2019).

## **Acknowledgments:**

395 We thank S. Trail and J. Vann for help in the field and laboratory as well as C. Dolph, J. Finlay, L. Johnson, E. Marschall, and T. Williamson for comments on an early draft which improved this work. We also thank L. Johnson for help identifying sampling sites and water quality monitoring data.

## **Funding:**

400 This research was supported by funds from The Ohio State University College of Arts and Sciences and an Edgerly Fellowship to WMK.

## **Author contributions:**

Conceptualization: WMK and JMH

Methodology: WMK, JMH, and SC

405 Investigation: WMK, JMH, and SC

Formal Analysis: WMK and JMH

Visualization: WMK and JMH

Funding acquisition: WMK and JMH

Project administration: JMH

410 Supervision: JMH

Writing – original draft: WMK and JMH

Writing – review & editing: WMK, JMH, and SC

**Competing interests:** Authors declare that they have no competing interests.

415 **Data and materials availability:** All data and analysis scripts can be found in our GitHub repository: <https://github.com/hood211/HighFlowSorption.git>.

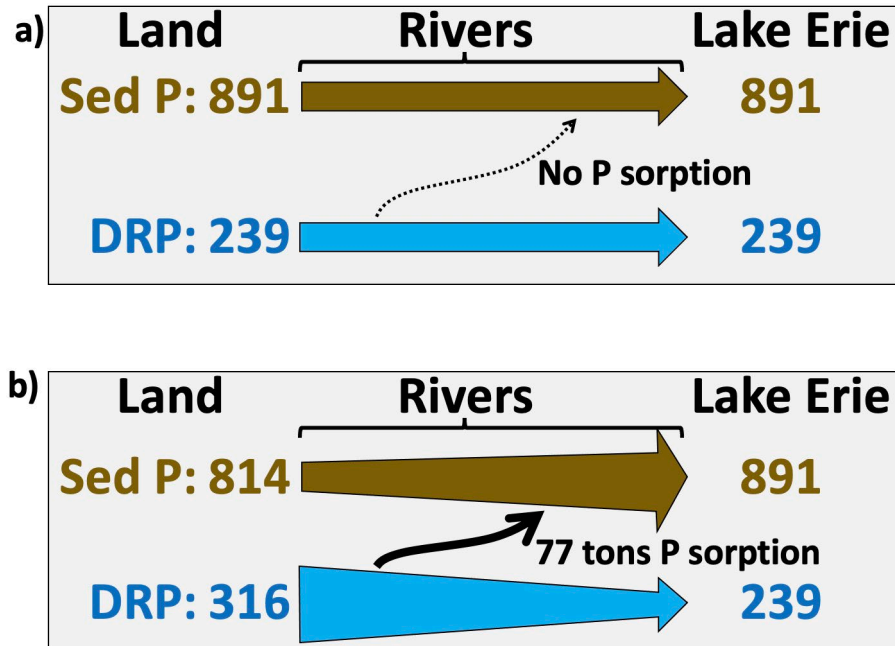

420

**Figure 1 | Present (a) and new (b) conceptual model of the role of streams and rivers in shaping P exports during high flow.** The present model conceptualizes these systems as pipes transporting DRP and sediment P downstream from land to recipient waters. Our findings recognize the role of P sorption in changing the form of P exports from DRP to sediment P, and thus decreasing P bioavailability. Values are means of March-June high flow event loads or P sorption (metric tons P) between 2003 and 2019.

425

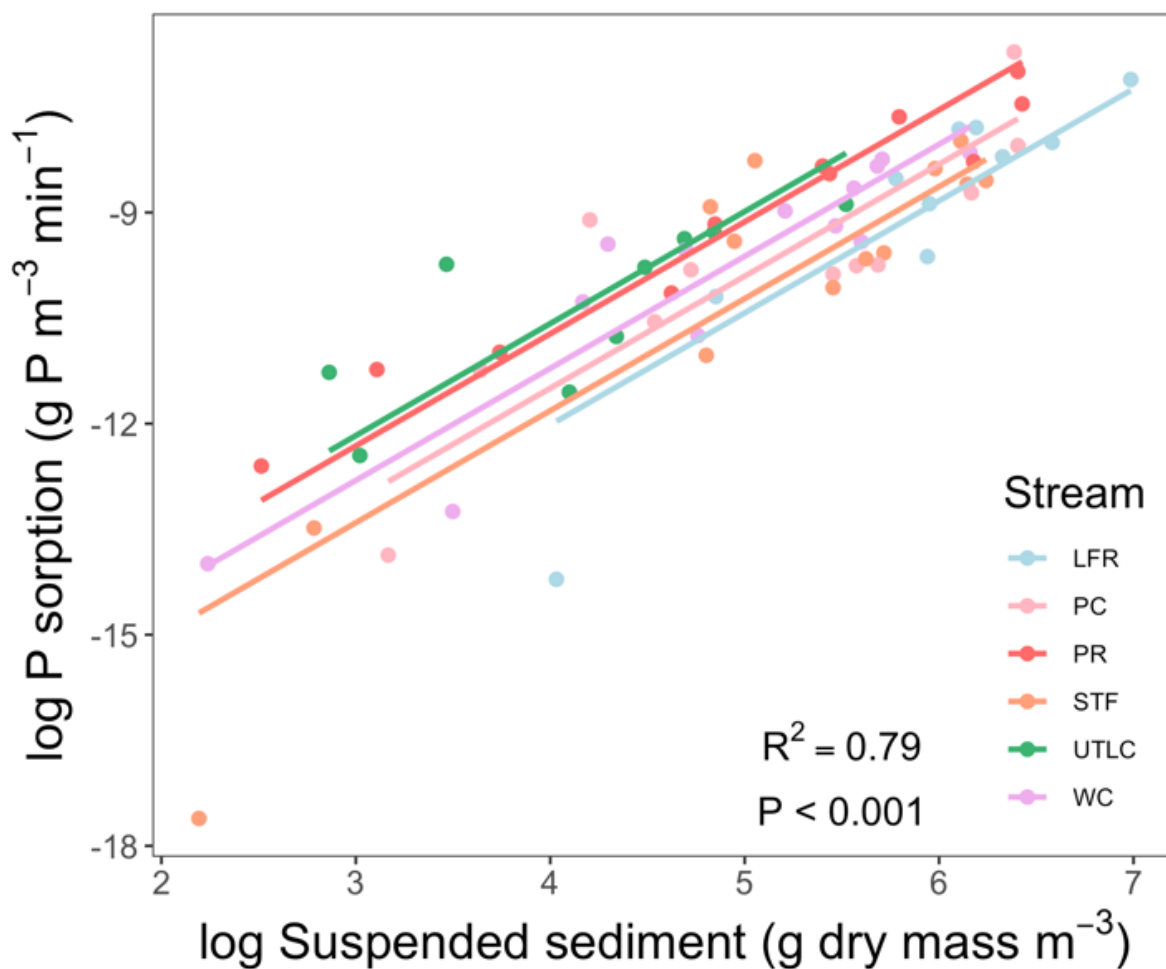

**Figure 2 | Phosphorus sorption increased with suspended sediment concentrations in six Maumee River tributaries.**

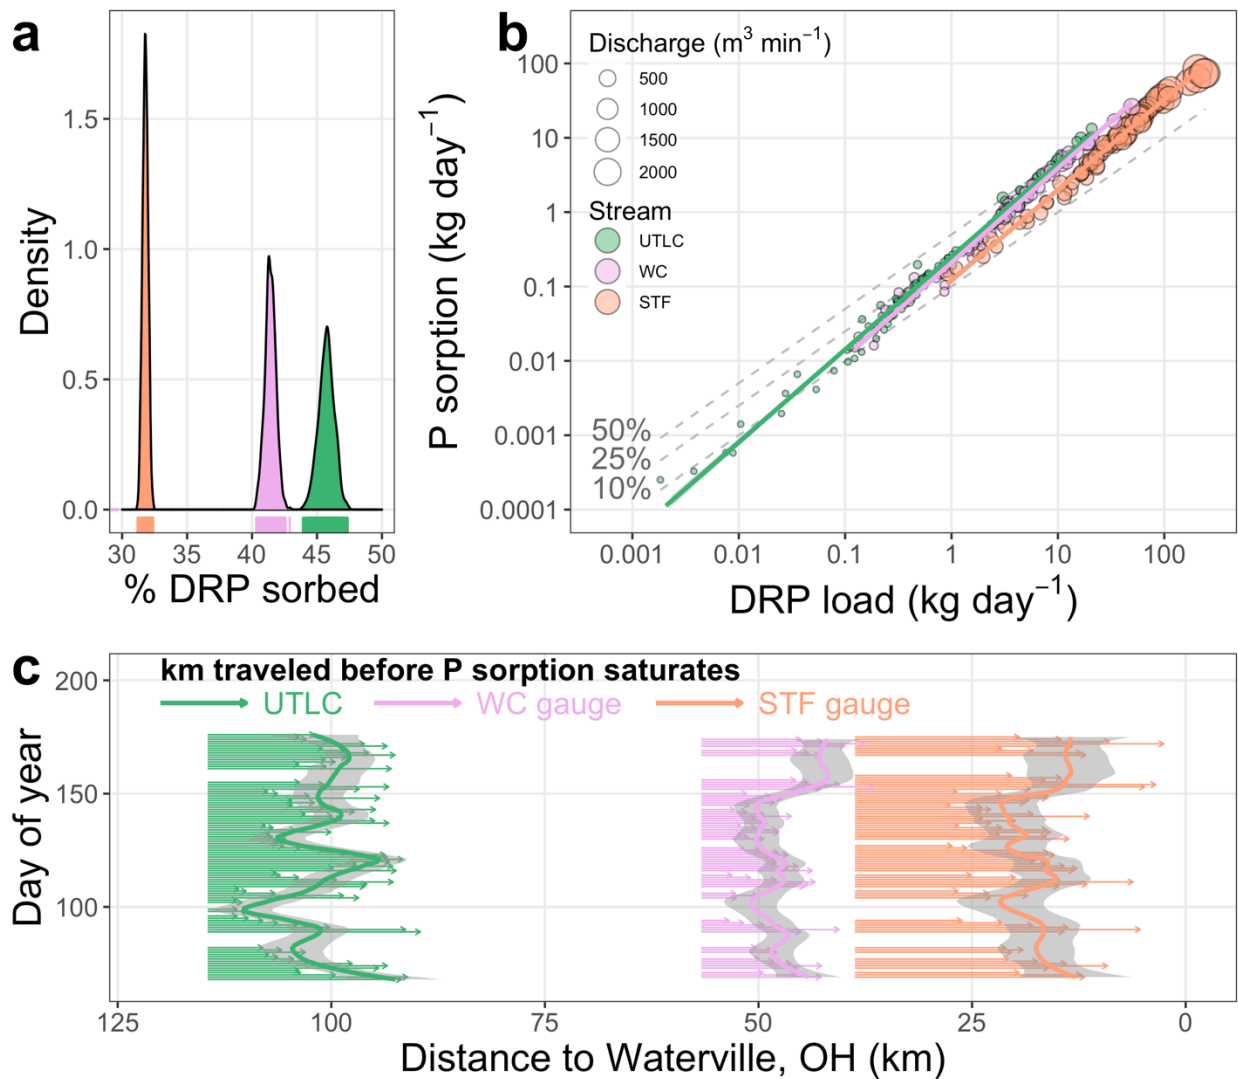

**Figure 3 | Characteristics of P sorption in three Maumee River tributaries.** **a**, The percent of DRP sorbed between March and June 2019 at high flows (< 25% flow exceedance). **b**, Phosphorus sorption increases more rapidly than DRP loading, indicating that the percent of DRP sorbed (dashed grey lines) increases from <10% to >50% with both DRP loads, discharge (point size), and suspended sediment loads (not shown). **c**, The daily mean distance suspended sediment travel during high flow before P sorption saturates (each arrow) is shorter than the distance to Lake Erie (Waterville, OH is 26 km from Lake Erie). Splines are a LOESS fit to aid visualization.

435

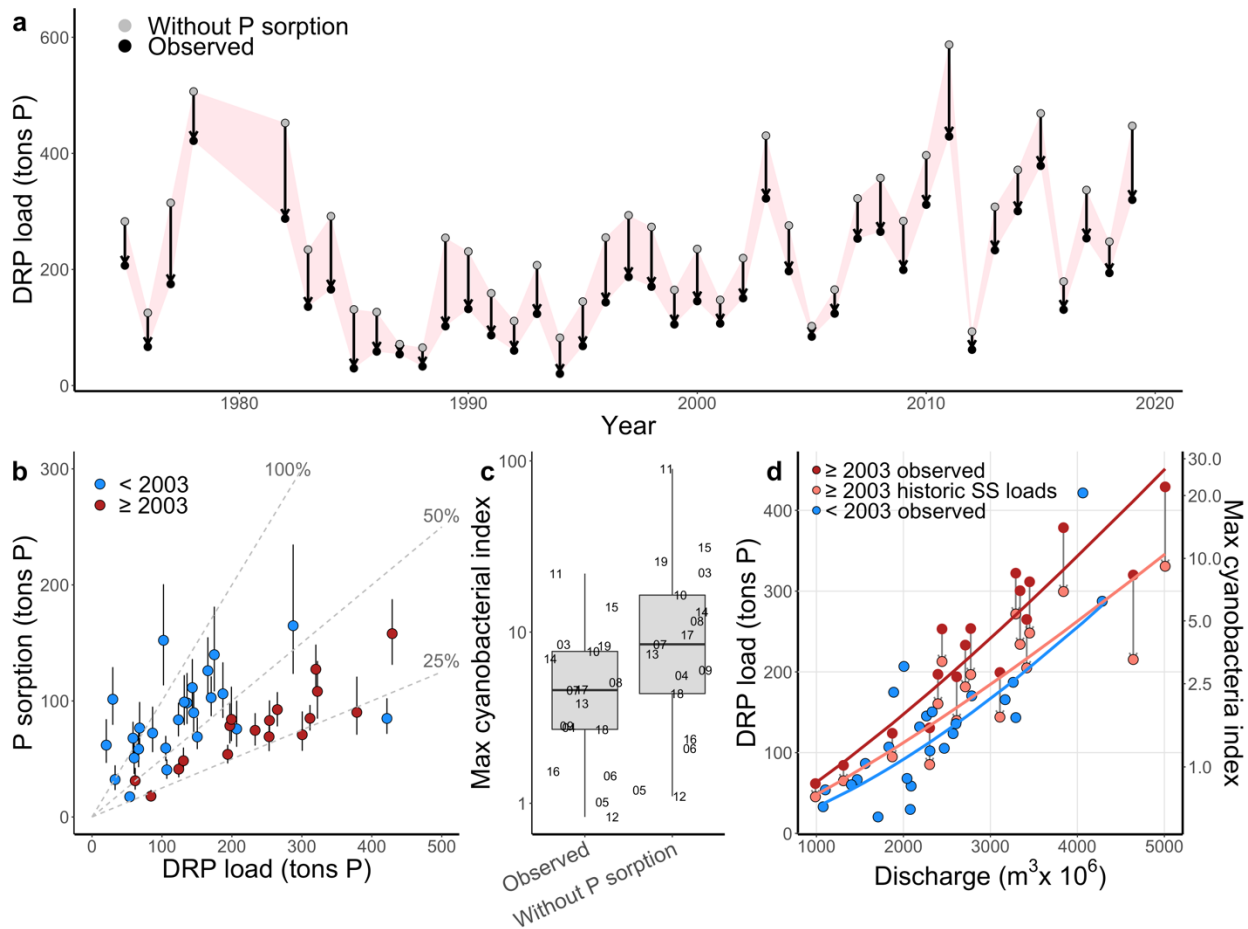

440

**Figure 4 | Dynamics, effects, and controls of P sorption in the Maumee River network. a,** Patterns in Maumee River DRP loads as observed and estimated in the absence of P sorption. **b,** Relationship between P sorption and DRP load illustrating differences in the percent of DRP sorbed (grey lines) for periods before and after 2003. **c,** Estimated effect of P sorption on the maximum cyanobacterial density. **d,** DRP load – discharge relationship before and after 2003 as well as with historical suspended sediment loads. Relationships for before 2003 and after 2003 with historic suspended sediment loads were statistically similar (Table S3), Values in **a-d** were calculated for high flows (<25% flow exceedance) between March and June.

450

## Supplementary Materials for

### River phosphorus cycling constrains cyanobacteria blooms

455

Whitney M. King<sup>1†</sup>, Susan E. Curless<sup>1</sup>, James M. Hood<sup>1,3\*†</sup>

\*Corresponding author: James Hood; hood.211@osu.edu

460

#### **This PDF file includes:**

Materials and Methods

Figs. S1 to S6

Tables S1 to S4

465



## 470 **Materials and Methods**

### *Stormwater sampling*

Our six focal stream sites were located within the Maumee River watershed (17,000 km<sup>2</sup>; Fig. 1c; Table S1) which is dominated by agricultural land use (~87%) and contains glacial till or lake plane soils with poor natural drainage (51). We sampled our focal streams between January  
475 and June 2019 for suspended sediment concentration, dissolved reactive P (DRP), and aspects of P sorption-desorption (sorption isotherms as well as sorption rates). Each site was located near a USGS stream gauging station. Four sampling sites cooccurred with a Heidelberg University National Center for Water Quality Research (NCWQR) water quality monitoring station (Fig. 1c).

480 Each focal stream was sampled once per storm event (Fig. S1) from a bridge by deploying 19 L containers to collect 75 L of stream water from the center of the main channel. Stream water was stored in these containers until processed in the laboratory.

Immediately following the collection of stream water, we homogenized the sample and collected triplicate dissolved reactive phosphorus and suspended sediment samples (expressed in  
485 terms of dry mass [DM]). DRP samples were immediately filtered through 0.45 µm glass fiber filters (Environmental Express, Charleston, SC, USA) into 20 mL HDPE scintillation vials (Fisher Scientific, Pittsburgh, PA, USA) using acid-washed syringes and kept cold (~ 4°C) until frozen in the laboratory. Dissolved reactive phosphorus was analyzed within two days of collection on a spectrophotometer using the colorimetric molybdenum blue reaction method (52).  
490 Suspended sediment samples were stored in 250 mL acid-washed HDPE plastic bottles, which were kept cold (~ 4°C) until filtered onto pre-weighed and ashed glass fiber filters (Whatman™

GF/F) within 24-hours. Sediment DM filters were dried at 60 °C for at least 48 hours and then reweighed.

495 The remainder of stream water was used to measure aspects of sediment P sorption-desorption. This water was transported to the laboratory in 19 L containers and stored in a dark environmental chamber set to the mean water temperature of the six streams. To consolidate the suspended sediment for analyses, we used a WVO Raw Power Continuous Flow Centrifuge (6000 RPM; WVO designs, Charleston, SC, USA). Stream water was transferred to a 20 L Nalgene carboy and set to a low flow-through rate ( $\sim 2 \text{ L h}^{-1}$ ) to minimize sediment loss through  
500 the centrifuge outflow. Sorption rate and isotherm measurements were conducted within one week.

### ***P sorption-desorption***

To characterize suspended sediment – DRP interactions, we used a multi-tiered approach which  
505 began with measurement of P sorption-desorption isotherms and ended with the calculation of mass-specific ( $\mu\text{g P mg DM}^{-1} \text{ h}^{-1}$ ) and volumetric ( $\mu\text{g P L}^{-1} \text{ h}^{-1}$ ) P sorption-desorption. We calculated several aspects of P sorption-desorption from P sorption isotherms including: the zero-equilibrium phosphorus concentration ( $\text{EPC}_0$ ;  $\mu\text{g P L}^{-1}$ ), the P sorbed to suspended sediment particles at the time of collection ( $S_{\text{amb}}$ ;  $\mu\text{g P mg DM}^{-1}$ ), the maximum P suspended sediment  
510 particles could sorb ( $S_{\text{max}}$ ;  $\mu\text{g P mg DM}^{-1}$ ), and the capacity for P sorption by suspended sediment particles during downstream transport ( $S_{\text{cap}}$ ;  $\mu\text{g P mg DM}^{-1}$ ).

*P sorption isotherms:* We measured P sorption-desorption isotherms following Jarvie et al. (53). Briefly, in 50 mL Falcon centrifuge tubes (Thermo Fisher Scientific, Corning, NY, USA), we combined consolidated suspended sediments ( $\sim 0.1\text{--}0.2 \text{ g}$ ) from each stream with an  
515 ‘artificial river water matrix’ similar in conductivity and calcium concentration to river water. To create this matrix, we mixed  $\text{CaCl}_2$  and deionized water at concentrations sufficient to mimic the

specific conductivity of the Maumee river at noon on the day of sampling (Waterville, OH; USGS station number: 04193490). Next, we spiked the centrifuge tubes with a 1000  $\mu\text{mol P}$  stock solution ( $\text{KH}_2\text{PO}_4$ ) to create a DRP concentration gradient (0, 2.5, 5, 10, 15, 20  $\mu\text{mol P}$ ).

520 Then, we placed the centrifuge tubes on an orbital shaker at 150 RPM in a dark environmental chamber set to the mean water temperature of the six streams. After 24 hours, we stopped the reaction by centrifuging the solution at 5000 RPM for 10 min and immediately filtered the supernatant through 0.45  $\mu\text{m}$  glass fiber filters (Environmental Express, Charleston, SC, USA) using acid-washed syringes into 20 mL HDPE scintillation vials (Fisher Scientific, Pittsburgh, PA, USA). Samples were frozen until analyzed for DRP. The sediment in each centrifuge tube  
525 was dried at 70  $^\circ\text{C}$  for 48 hours and weighed.

To estimate P sorption parameters, we fit data obtained from the P sorption isotherm experiments to a Langmuir adsorption isotherm model following Lai and Lam (54). We selected the Langmuir model because it was a good fit to our data and provided parameters relevant to  
530 subsequent analyses (e.g.,  $S_{\text{amb}}$  and  $S_{\text{max}}$ ). In the Langmuir isotherm model, DRP removed during the 24 h incubation ( $S_{24}$ ) is

$$S_{24} = \frac{S_{\text{max}} K C}{1 + K C} - S_{\text{amb}} \quad (\text{eq. 1})$$

where,  $K$  is the bonding energy constant, and  $C$  is the DRP concentration of the supernatant after the 24-hour incubation. Sorption capacity ( $S_{\text{cap}}$ ) is the difference between  $S_{\text{max}}$  and  $S_{\text{amb}}$ . Our  
535 model fits were evaluated based on visual evaluation of residuals and model residual standard errors. One or two outliers were removed from twelve out of 78 isotherm models. Data from four sorption isotherms did not conform to the Langmuir model. Of those, three were fit with a linear isotherm model relating  $S_{24}$  and  $C$  while one isotherm did not conform to any model we evaluated.

540 We used the Langmuir model parameters to estimate  $EPC_0$ , the DRP concentration which, when placed in contact with sediment, produces no net exchange of DRP in solution over a 24-hour period. We calculated  $EPC_0$  by rearranging equation 1:

$$EPC_0 = \frac{S_{amb}}{S_{max} K - S_{amb} K} \quad (\text{eq. 2})$$

545  $EPC_0$  can be used to characterize whether sediments sorb or desorb P. When  $EPC_0$  is greater than stream DRP concentrations sediments release DRP, whereas, sediments sorb DRP when  $EPC_0$  is less than stream water DRP concentrations (55).

*P sorption-desorption rates:* We measured P sorption and desorption rates by suspended sediments following Jarvie et al (53); however, since suspended sediments desorbed P under ambient conditions in only one of 78 samples (based on the difference between  $EPC_0$  and stream water DRP concentrations) we only present P sorption rates. To measure P sorption rates, we 550 added 0.1 – 0.2 g of consolidated suspended sediments to 50 mL Falcon centrifuge tubes containing an ‘artificial river water matrix’ (see above) enriched with a P stock (as  $KH_2PO_4$ ) to the stream water DRP concentration at the time of sampling. We shook the centrifuge tubes on an orbital shaker (set at 150 RPM) located in a dark environmental chamber, which was set to the 555 mean stream temperature at the time of sampling, for the following incubation periods: 0, 1, 3, 5, 10, 15, 30, 45, and 60 minutes. Pilot experiments indicated that DRP concentrations reached equilibrium within less than one hour. To terminate the incubation, we centrifuged the samples and collected DRP and sediment samples as described above.

560 We calculated suspended sediment P sorption on a dry mass-specific ( $S_{s,MS}$ ,  $\mu\text{g P g DM}^{-1} \text{ h}^{-1}$ ) and volumetric basis ( $S_{s,v}$ ,  $\mu\text{g P L}^{-1} \text{ h}^{-1}$ ). First, we estimated the proportional loss rate ( $k$ ) as the slope of the relationship between log-transformed DRP per sediment mass ( $\mu\text{g P g DM}^{-1}$ ) and time. Prior to fitting this model with simple linear regression, we removed samples representing

time points after DRP concentrations converged to an equilibrium since these data did not meet model assumptions of log-linear change over time. Mass-specific P sorption rate is

565 
$$S_{S,MS} = \frac{k \text{ DRP}_{amb}}{SM} \quad (\text{eq. 3})$$

where  $\text{DRP}_{amb}$  is the ambient stream water DRP concentration ( $\mu\text{g DRP L}^{-1}$ ) and  $SM$  is the mean sediment dry mass (g DM) in the centrifuge tubes. Volumetric P sorption ( $S_{S,V}$ ) in the stream at the time of sediment collection is

$$S_{S,V} = S_{S,MS} SS_{amb} \quad (\text{eq. 4})$$

570 where  $SS_{amb}$  is the stream water total suspended solid concentration ( $\text{g DM L}^{-1}$ ) at the time of sediment collection in each stream.

### ***Discharge and flow exceedance***

Discharge data for each tributary and the Maumee River was retrieved from National Water

575 Information System (<http://waterdata.usgs.gov/nwis>) (56). We used the available data for each system (Table S1) to calculate the percent of time each flow was exceeded during the record as:

$$\rho = \frac{r}{n+1} \times 100 \quad (\text{eq. 5})$$

where  $r$  is the rank of the 15-minute flow according to its magnitude and  $n$  is the total number of 15-minute flows in the tributaries or water quality samples for the Maumee River (57).

580

### ***Total P sorption in tributaries***

To estimate the impact of P sorption on DRP export from our focal tributaries at the watershed scale, we combined our P sorption estimates with publicly available discharge, DRP, and

suspended sediment data to estimate P sorption by all sediments transported by our sampling

585 sites between March and June 2019 at 0-25% flow exceedance (hereafter high flow). Only three of our six focal tributaries (STF, UTLC, and WC) had sufficient DRP and suspended sediment data to support this analysis. To begin, we combined NCWQR (58) water quality data with

USGS discharge data to estimate loading rates. Since NCWQR water quality data was collected less frequently (~1-3x per day) than the USGS discharge data (~every 15 minutes), we used  
 590 generalized additive mixed models (GAMM) to predict the missing DRP and suspended sediment concentrations (59). Our GAMMs for DRP and suspended sediment concentrations used a thin plate regression spline for discharge and a cyclic cubic regression spline for month. All models had normal residuals, little prediction bias, and high  $R^2$ 's ( $R^2_{adj} = 0.46 - 0.58$ ). GAMMs were fit with the “gamm” function in the package “mgcv” (60) in the R statistical  
 595 environment (61). We calculated DRP and suspended sediment loads as the product of discharge, the time between discharge measurements (generally 15 minutes), and DRP or suspended sediment concentrations, respectively.

Next, we combined water quality and discharge data with sorption rate measurements to estimate P sorption by suspended sediments during high flow events between March and June  
 600 2019. Our approach accounted for both the P sorption capacity of suspended sediments and the influence of DRP concentrations on P sorption-desorption by sediments. We began by estimating a watershed-scale mass-specific sorption rate ( $S_{W,MS}^{t,i}$ ; g P g DM<sup>-1</sup> h<sup>-1</sup>) in tributary  $t$  for each time  $i$  (associated with a discharge measurement) as:

$$S_{W,MS}^{t,i} = \begin{cases} (S_{S,MS}^t \tau_{t,i}) < S_{cap,t} = S_{S,MS}^t \tau_{t,i} \\ (S_{S,MS}^t \tau_{t,i}) > S_{cap,t} = S_{cap,t} \end{cases} \quad (\text{eq. 6})$$

605 where  $\tau_{t,i}$  is travel time in tributary  $t$  at time  $i$  (h; described below),  $S_{S,MS}^t$  is the mass-specific P sorption of sediment in tributary  $t$ , and potential watershed-scale mass-specific sorption ( $S_{S,MS}^t \times \tau_{t,i}$ ) is constrained to be no greater than the P sorption capacity of the suspended sediments in tributary  $t$  ( $S_{cap,t}$ ; g P g DM<sup>-1</sup>). Then, we calculated watershed-scale volumetric sorption ( $S_{W,V}^{t,i}$ ; g P g m<sup>-3</sup> h<sup>-1</sup>) in tributary  $t$  at time  $i$  as:

$$S_{W,V}^{t,i} = \begin{cases} \text{DRP}_{t,i} - (S_{W,MS}^{t,i} SS_{t,i}) > (\text{DRP}_{t,i} - \text{EPC}_{0,t}) = \text{DRP}_{t,i} - \text{EPC}_{0,t} \\ \text{DRP}_{t,i} - (S_{W,MS}^{t,i} SS_{t,i}) < (\text{DRP}_{t,i} - \text{EPC}_{0,t}) = (S_{W,MS}^{t,i} SS_{t,i}) \end{cases} \quad (\text{eq. 7})$$

where  $\text{DRP}_{t,i}$  ( $\text{g P m}^{-3}$ ) and  $SS_{t,i}$  ( $\text{g DM m}^{-3}$ ) are the DRP and suspended sediment concentrations in tributary  $t$  at time  $i$ , respectively, and potential watershed-scale volumetric sorption

$(S_{W,MS}^{t,i} \times SS_{t,i})$  is constrained so that P sorption does not reduce DRP concentrations below  $\text{EPC}_0$ , which reflects an equilibrium between sediment sorption-desorption and stream water

DRP. Finally, we estimated total P sorption ( $S_{\text{Tot},t}$ ; metric ton P) in tributary  $t$  integrating across all time periods meeting our criteria (i.e., all  $i$ 's) as:

$$S_{\text{tot},t} = \sum_{i=1}^n (S_{W,V}^{t,i} w_i) \quad (\text{eq. 8})$$

where  $w_i$  is the time between discharge measurements (i.e., times  $i-1$  to  $i$ ). To estimate the uncertainty associated with our measurements, we bootstrapped these calculations ( $n = 500$ )

using all estimates of sorption rate, sorption capacity, and  $\text{EPC}_0$  for tributary  $t$ .

### ***Total P sorption in Maumee River network***

To estimate the total net P sorption within the Maumee River network at 25 percent exceedance

flows between March and June in each year from 1975 to 2019, we combined watershed-scale

mass-specific P sorption from the three tributaries ( $S_{W,MS}^{t,i}$ ), with publicly available discharge,

DRP, and suspended sediment data for the Maumee River at Waterville, OH (retrieved from

NCWQR (58)). Maumee River sediment and DRP loads were calculated as the product of DRP

or suspended sediment concentration, discharge, and the time between samples. We calculated

Maumee River mass-specific P sorption for time period  $w_i$  as:

$$S_{M,MS}^j = \frac{S_{W,V}^{t,i} w_i}{SL_{t,i}} \quad (\text{eq. 9})$$

where  $SL_{t,i}$  is the sediment load in tributary  $t$  during the time period  $w_i$ . Maumee River mass-

specific P sorption incorporates watershed-scale constraints on P sorption including: P sorption

capacity, the influence of DRP on P sorption-desorption dynamics, and the capacity of sediments to sorb P during downstream transport to the monitoring site on the Maumee River at Waterville, OH. Total P sorption by Maumee River suspended sediment during periods meeting our criteria in year  $y$  is:

$$S_{tot,M}^y = \sum_{j=1}^n (S_{M,MS}^j \times SL_{M,j}) \quad (\text{eq. 10})$$

where  $SL_{M,j}$  is the Maumee River suspended sediment load during time window  $w_i$ . To estimate the uncertainty associated with total P sorption we bootstrapped these calculations ( $n = 500$ ) using all estimates of watershed-scale mass-specific sorption rate ( $S_{W,MS}^{t,i}$ ) from the tributaries.

### ***Impact of sorption on cyanoHABs***

Finally, to determine the impact of P sorption on cyanoHABs in western Lake Erie, we estimated the maximum cyanobacterial index ( $CI_{max}$ ;  $10^{20}$  cells), a satellite-based measure of the annual maximum cyanoHABs density, for each year between 2003 and 2019 following Stumpf et al. (21):

$$CI_{max} = 0.48 \times 10^{(0.00387 \text{ DRP}_{MJ})} \quad (\text{eq. 11})$$

where  $DRP_{MJ}$  is the DRP load (metric tons) for periods between March and June with flows greater than 25% exceedance. Since this model was calibrated using data from 2002 to 2015, we did not estimate maximum cyanobacterial index for years before 2002. This model provides a good fit to the data; however, a more widely used model which uses total bioreactive P and includes July loads provides a slightly better fit for some years (21). We used equation 10, instead of other alternatives, because it was simple and did not require extrapolating P sorption beyond our sampling period.

### ***Travel time***

For each reach between stream gauging stations, we estimated travel time ( $\tau$ ) following Du et al. (62):



$$\tau = L(S^{3/8}Q^{1/4}n^{-3/4})^{-1} \quad (\text{eq. 12})$$

660 where  $L$  is the reach length between gauging stations (km),  $S$  is the mean river slope between gauging station ( $km\ km^{-1}$ ),  $Q$  is discharge ( $m^3\ min^{-1}$ ), and  $n$  is Manning's coefficient ( $m^{1/3}\ min^{-1}$ ). Reach lengths and slopes between our six tributary sampling sites and the Maumee River at Waterville, OH (Fig. S2) were calculated using the qProf plugin in QGIS (Version 3.8). For the Manning's coefficient, we selected a value of  $6.2 \times 10^{-3}\ m^{1/3}\ min^{-1}$  665 which was estimated for the Middle Fork of the Vermilion River (near Danville, IL) (63). This site was similar to our tributaries in terms of riverbed and bank composition.

### ***Statistical analyses***

To examine how discharge and stream identity influences tributary P sorption and suspended 670 sediment loads, we used linear models and an information theoretic approach (64). Models were ranked by AIC<sub>C</sub> and the models with a delta AIC<sub>C</sub> less than two were considered to have the most support (64). To examine the relationship between tributary sediment equilibrium phosphorus concentration (EPC<sub>0</sub>) and DRP concentration, we used standardized major axis regression using the *smatr* package (65). We selected this approach over a general linear model 675 because we wished to estimate the slope of the EPC<sub>0</sub>-DRP relationship and because, due to a poor understanding of whether EPC<sub>0</sub> was shaping DRP or vice versa, we considered these regression terms symmetric. We also used linear models to examine how Maumee River DRP load – discharge relationships changed over time. In this case, we compared p-values, following the guidelines of Wasserstein (66), for a grouping variable separating 1975–2002 and 2003– 680 2019.

To examine the influence of declines in suspended sediment loads between 1975 and 2019 on P sorption and ultimately DRP loading to Lake Erie, we had to account for intra-annual

changes in discharge. We accomplished this by examining changes in the DRP load–discharge relationship, following a four-step process. We built a linear model relating Maumee River high flow March–June suspended sediment loads to discharge and year. We used that model to predict suspended sediment loads for each year between 1975 and 2019 with year in the prediction equation fixed to 1975. We used these predicted suspended sediment loads, which account for interannual changes in discharge, to estimate P sorption (approach described above) and, finally, DRP loads with historic (i.e., 1975) suspended sediment loads and P sorption. We used linear models to examine how the DRP load–discharge relationships differed between 1975 to 2002 observed DRP loads and 2003 to 2019 DRP loads predicted with historic suspended sediment loads and P sorption rates. Prior to analyses, we used qqplots to assess normality assumptions. Most terms were  $\log_{10}$  transformed while flow exceedance was raised to the 6<sup>th</sup> power for analyses. All data and analysis scripts can be found in our GitHub repository:

<https://github.com/hood211/HighFlowSorption.git>.

## Supplementary Figures

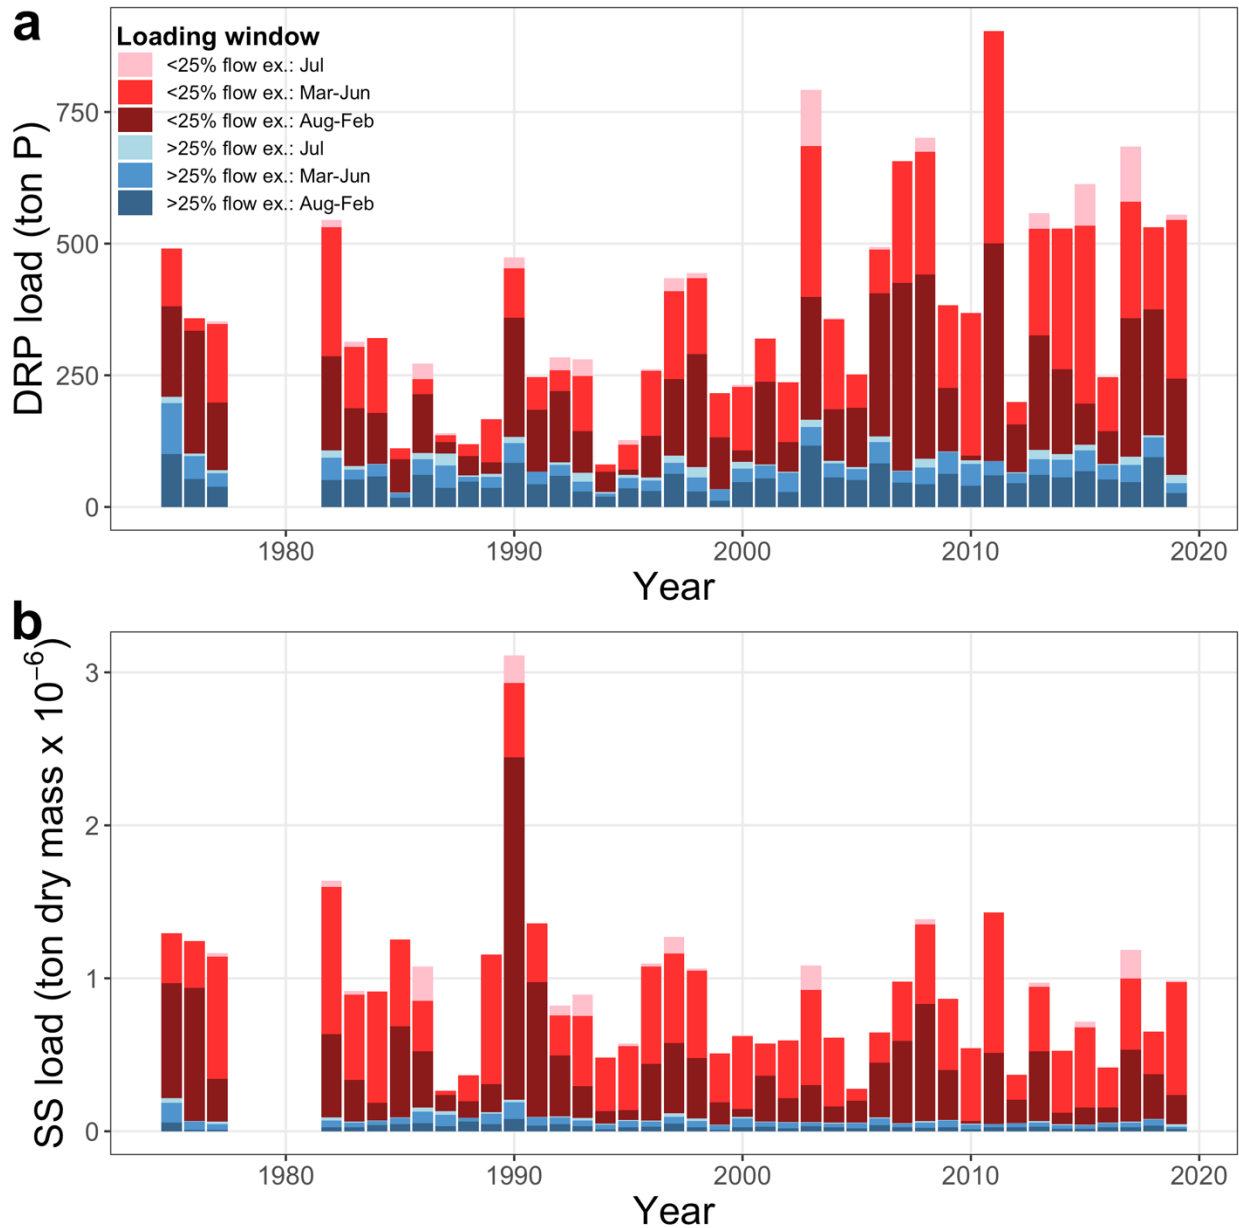

700

**Figure S1.** Dissolved reactive phosphorus (DRP, **a**) and suspended sediment (SS, **b**) loads during low (>25% flow exceedance) and high (<25% flow exceedance) flows integrated across three time windows: August–February, March–June, and July. In contrast to Lake Erie cyanoHAB forecast models, this study focuses on high flow periods during March–June because that window overlapped with our tributary sampling and because July represented a small

705 portion of March-July DRP ( $7.9\% \pm 12.3\%$ ; mean of annual estimates between 1975 and 2019  $\pm$  1 standard deviation) and suspended sediment loads ( $5.6\% \pm 10.0\%$ ). Between March and June, high flow DRP and suspended sediment loads represent  $75.0\%$  ( $\pm 14.8\%$ ) and  $88.0\%$  ( $\pm 12\%$ ), respectively of total loads during these time windows. Note that sufficient data was not available during 1978-1981 to calculate loads.

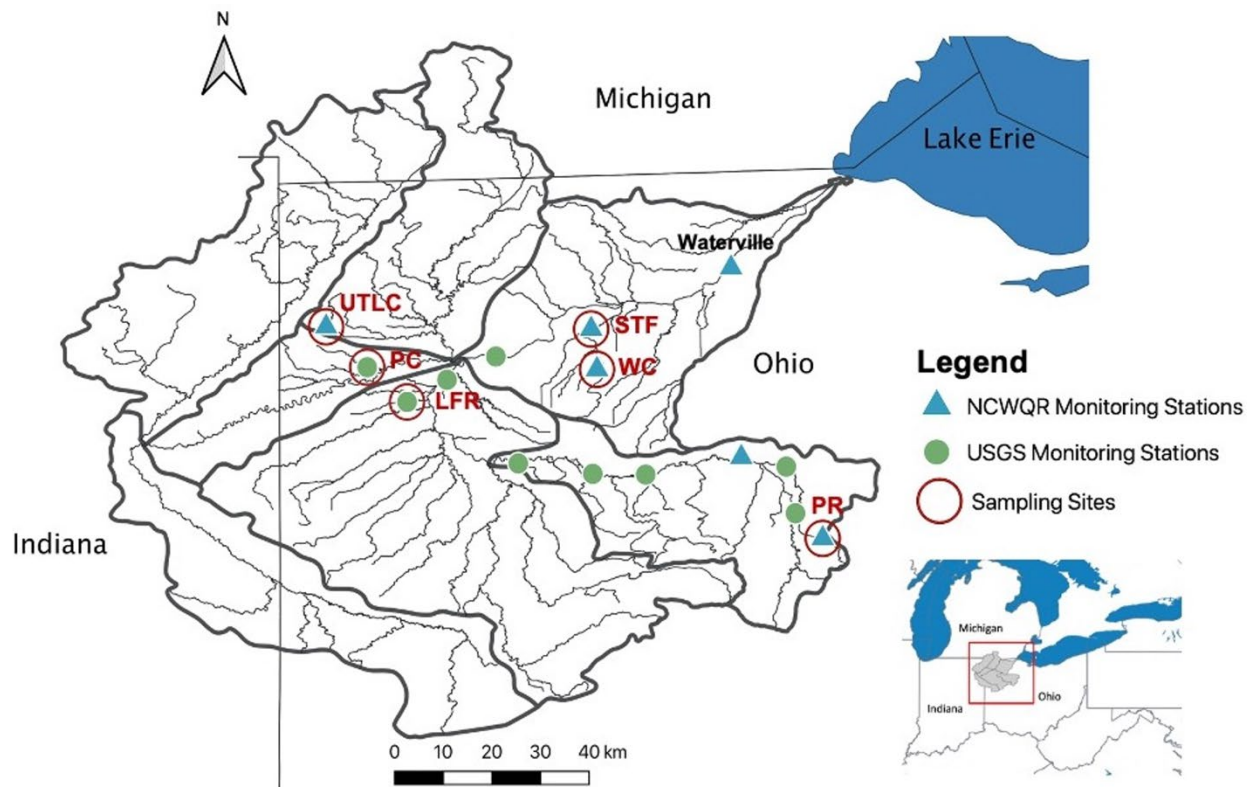

710

**Figure S2.** Map of the Maumee River watershed illustrating the location of study sites and relevant discharge (U.S. Geological Survey [USGS]) and water quality (National Center for Water Quality Research [NCWQR]) monitoring stations.

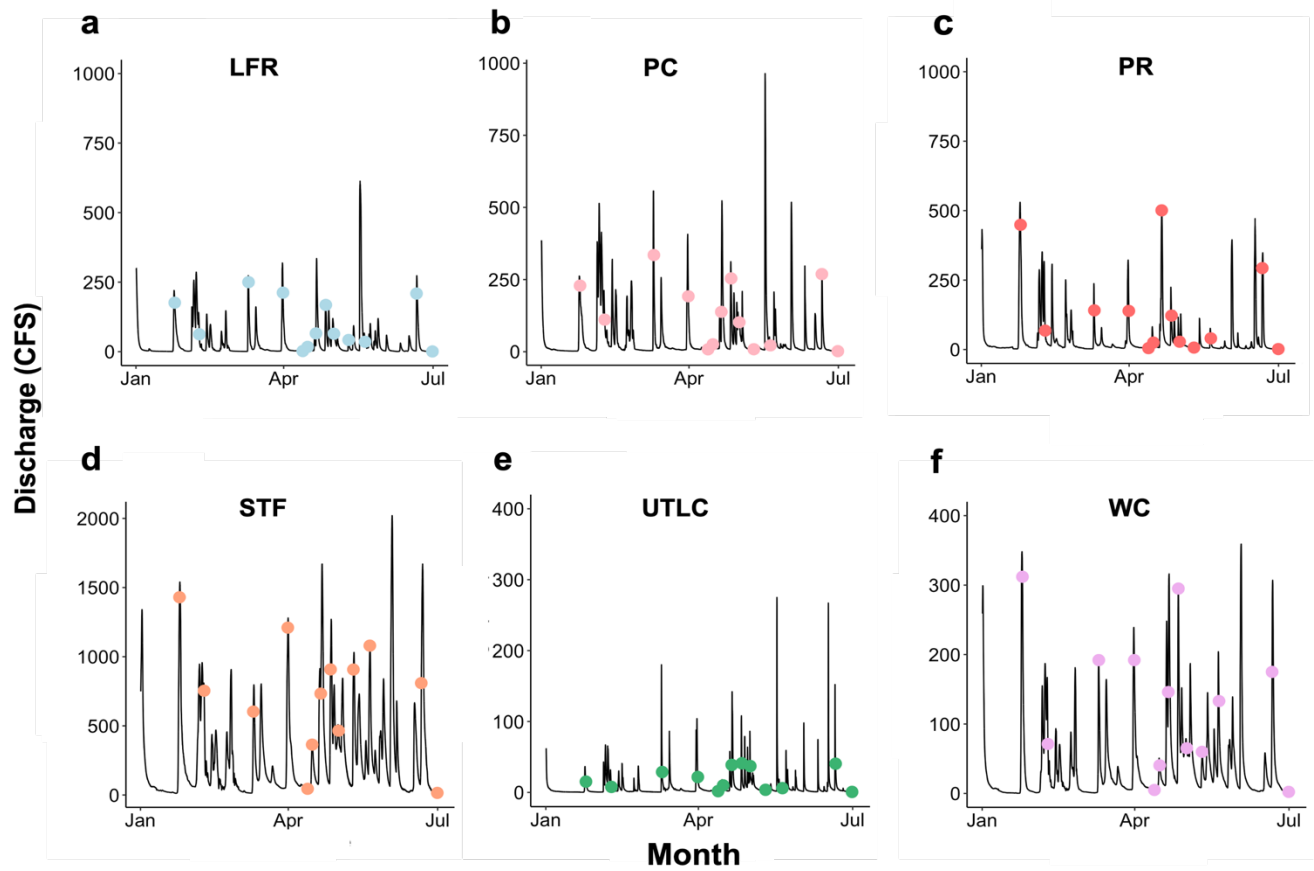

715

**Figure S3.** Hydrograph of the six focal streams from January to June 2019 (a-f). Points indicating timing of instream sampling. The y-axis scale differs among hydrographs.

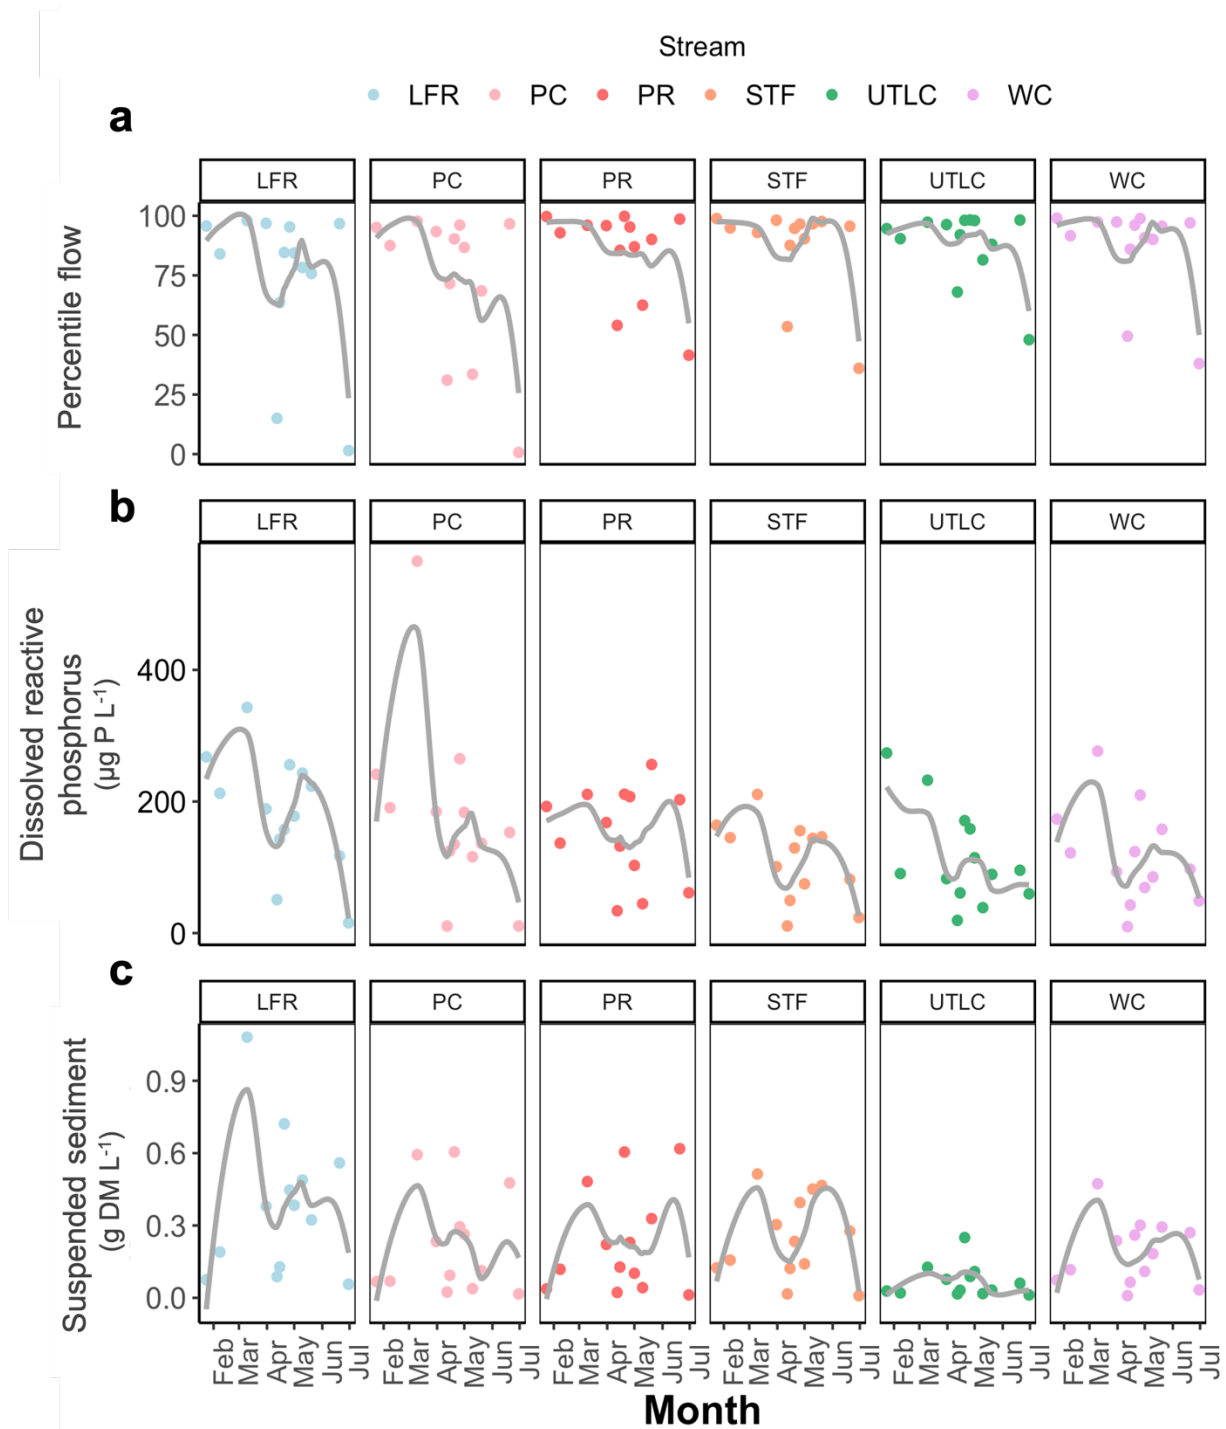

**Figure S4.** Percentile flow (a), dissolve reactive phosphorus (DRP; b), and suspended sediment dry mass (DM; c) for all stream sites between January and June 2019. Grey lines are loess fits.

720

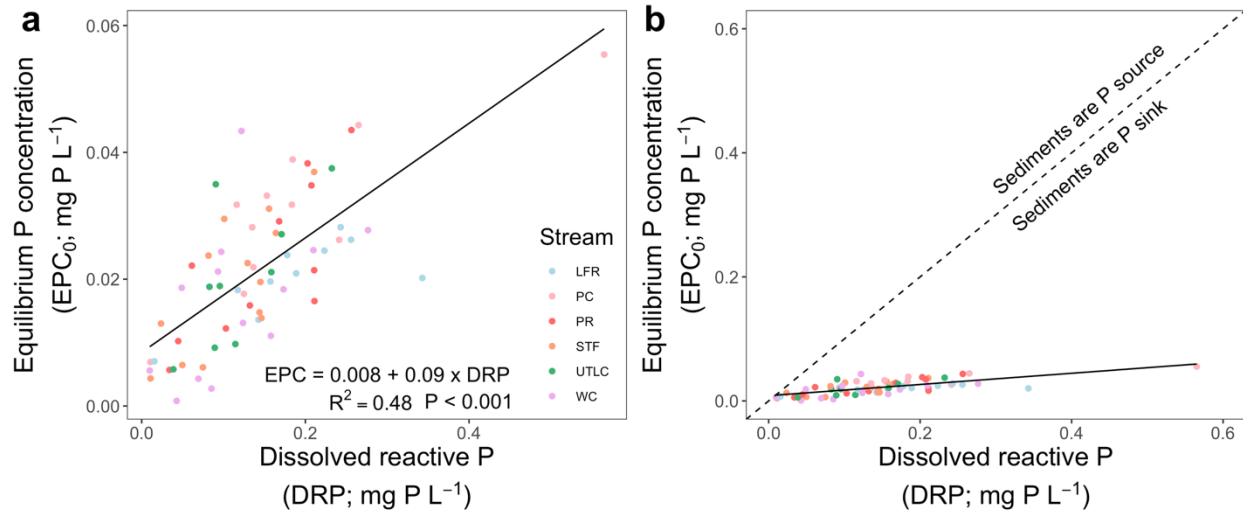

**Figure S5.** Relationships between suspended sediment equilibrium phosphorus concentration

(EPC<sub>0</sub>) and stream water dissolved reactive phosphorus (DRP) concentrations in six Maumee

725

River tributaries with major standardized axis model regression line and statistics (a). These

same data are also presented with equal x- and y-axis scales as well as a one-to-one line (dashed

line) to illustrate P source/sink behavior (b). Sediment samples with values below the one-to-one

line are P sinks while those with values above the one-to-one line are P sources.



730

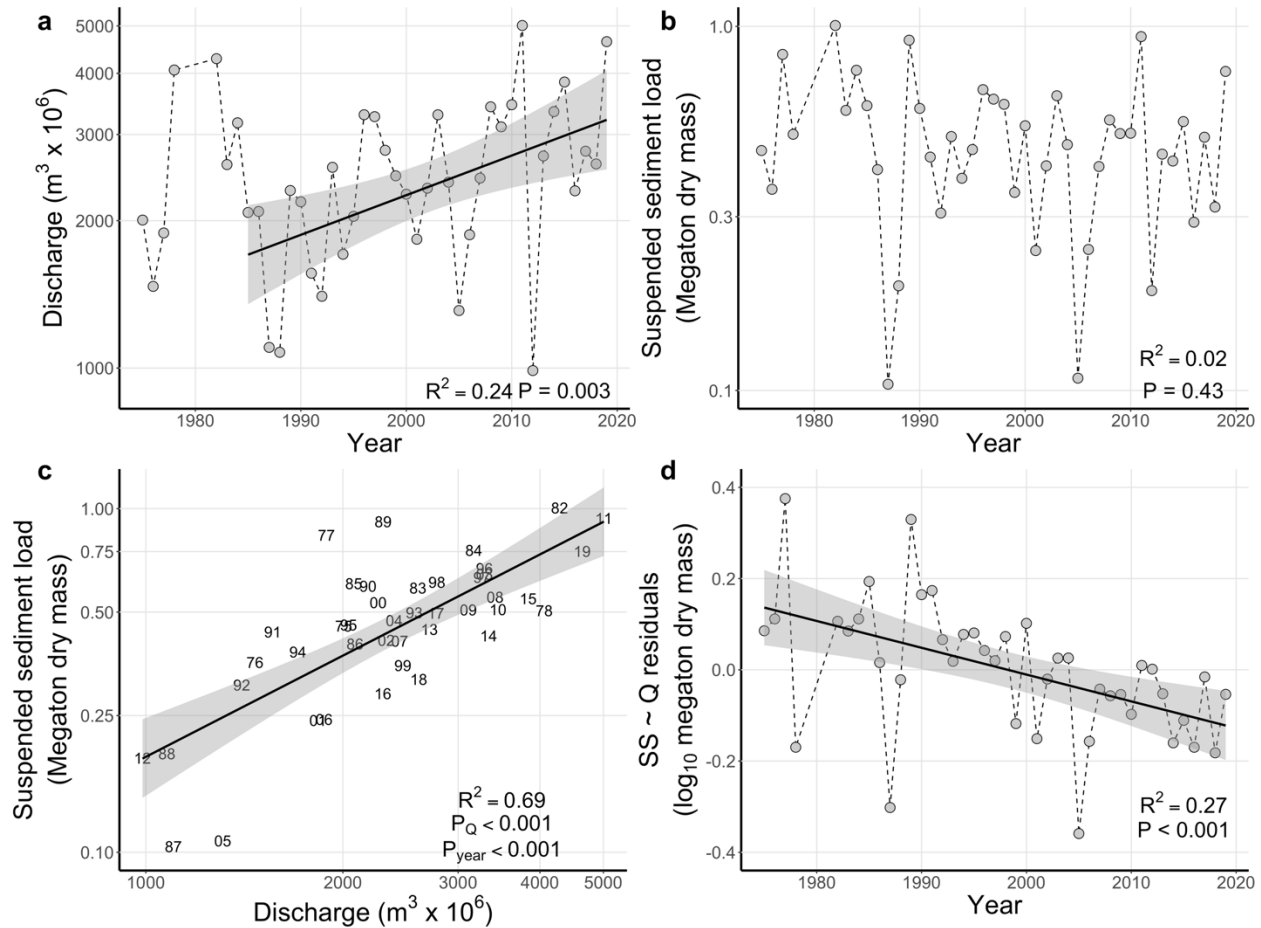

**Figure S6.** In the Maumee River, discharge has generally increased over time since 1985 (a), whereas suspended sediment loads have not changed (b). However, suspended sediment loads increase with discharge (c) and, when discharge is held constant (in a multiple regression model) suspended sediment loads have decreased between 1975 and 2019 (d). Panel d shows the residuals of the suspended sediment (SS) – discharge (Q) relationship and year. All values are for high flows (<25% flow exceedance) between March and June. Regression statistics are from general linear models. Panel c provides  $R^2$  and p-values from a model relating suspended sediment loads to discharge and time whereas panel d provides regression statistics for a linear regression between SS – Q residuals and year.

735

740



## Supplementary Tables

**Table S1.** Site information for the six focal tributaries and the Maumee River including stream code, USGS site IDs, drainage area stream order based on the Strahler method, and the years of discharge data used to calculate maximum flow.

| Stream name                     | Stream code | USGS Site ID | Drainage area (km <sup>2</sup> ) | Stream order (Strahler) | Years used to calculate flow exceedance |
|---------------------------------|-------------|--------------|----------------------------------|-------------------------|-----------------------------------------|
| Little Flat Rock                | LFR         | 04191444     | 39.6                             | 2                       | 2015-2019                               |
| Platter Creek                   | PC          | 04183979     | 50.5                             | 2                       | 2018-2019                               |
| Potato Run                      | PR          | 04188324     | 44.5                             | 1                       | 2017-2019                               |
| South Turkey Foot               | STF         | 04192599     | 300.4                            | 3                       | 2015-2019                               |
| Unnamed Tributary to Lost Creek | UTLC        | 04185440     | 10.8                             | 1                       | 2015-2019                               |
| West Creek                      | WC          | 04192574     | 40.2                             | 1                       | 2015-2019                               |
| Maumee River at Waterville, OH  | MR          | 04193500     | 17,000                           | 7                       | 1987-2019                               |

**Table S2.** Model selection table examining how tributary suspended sediment load (SS) and P sorption are shaped by discharge (expressed as flow exceedance probability), tributary identity, and suspended sediment loads.

| <b>Model</b>                   | <b>df</b> | <b>AIC<sub>c</sub></b> | <b>ΔAIC<sub>c</sub></b> | <b>Weight</b> | <b>R<sup>2</sup></b> |
|--------------------------------|-----------|------------------------|-------------------------|---------------|----------------------|
| <i>Suspended sediment load</i> |           |                        |                         |               |                      |
| ~ flow ex. + tributary         | 8         | 136.2                  | 0.00                    | 0.95          | 0.75                 |
| ~ flow ex. × tributary         | 13        | 142.2                  | 5.94                    | 0.05          | 0.78                 |
| ~ flow ex.                     | 3         | 181.8                  | 45.61                   | 0             | 0.41                 |
| <i>P sorption</i>              |           |                        |                         |               |                      |
| ~ SS + tributary               | 8         | 187.8                  | 0                       | 0.65          | 0.81                 |
| ~ SS × tributary               | 13        | 189.2                  | 1.43                    | 0.32          | 0.84                 |
| ~ SS                           | 3         | 194.1                  | 6.36                    | 0.27          | 0.75                 |
| ~ flow ex.+ tributary          | 8         | 231.9                  | 44.12                   | 0             | 0.69                 |
| ~ flow ex. × tributary         | 13        | 234.6                  | 46.85                   | 0             | 0.63                 |
| ~ flow ex.                     | 3         | 246.5                  | 58.68                   | 0             | 0.45                 |

**Table S3.** Linear regression model tables for relationship between  $\log_{10}$  DRP load and  $\log_{10}$  discharge for observed values during two time windows and for DRP loads predicted with historic sediment loads. Values provided for intercept and discharge are the coefficient, standard error, and p-value. P-values less than 0.05 are in bold to aid interpretation. Discharge and DRP load values are for the greater than 25% exceedance flows between March and June. These data are shown in Fig. 4d.

|                         | Observed                            |                                      | Predicted with historic sediment loads |
|-------------------------|-------------------------------------|--------------------------------------|----------------------------------------|
| Time window             | (1975 – 2002)                       | 2003 – 2019                          | 2003 – 2019                            |
| Intercept               | -2.91 ( $\pm$ 0.94; <b>0.005</b> )  | -1.86 ( $\pm$ 0.34; < <b>0.001</b> ) | -2.00 ( $\pm$ 0.48; < <b>0.001</b> )   |
| Discharge               | 1.48 ( $\pm$ 0.28; < <b>0.001</b> ) | 1.22 ( $\pm$ 0.10; < <b>0.001</b> )  | 1.22 ( $\pm$ 0.14; < <b>0.001</b> )    |
| Adjusted R <sup>2</sup> | 0.52                                | 0.90                                 | 0.83                                   |
| df                      | 23                                  | 15                                   | 15                                     |
| F-statistic             | 27.44                               | 148                                  | 76.9                                   |
| P-value                 | < 0.001                             | < 0.001                              | < 0.001                                |

**Table S4.** Linear regression model tables for relationship between  $\log_{10}$  DRP load and  $\log_{10}$  discharge (Q) supporting two comparisons.

20 The first group (G) examines differences in DRP – discharge relationships between 1975 – 2002 and 2003 – 2019. The second group examines differences in DRP – discharge relationships comparing 1975 – 2002 observed DRP loads with 2003 – 2019 DRP loads predicted with historic sediment loads. Note that for the second comparison the group effect is not significant. Values provided for intercept and discharge are the coefficient, standard error, and p-value. P-values less than 0.05 are in bold to aid interpretation. Discharge and DRP load values are for greater than 25% exceedance flows between March and June. These data are shown in Fig. 4d.

25

| Group                   | 1975 – 2002 observed v. 2003 – 2019 observed |                                      | 1975 – 2002 observed v. 2003 – 2019 predicted with historic sediment loads |                                      |
|-------------------------|----------------------------------------------|--------------------------------------|----------------------------------------------------------------------------|--------------------------------------|
|                         | Intercept                                    | -2.91 ( $\pm$ 0.76; < <b>0.001</b> ) | -2.50 ( $\pm$ 0.55; < <b>0.001</b> )                                       | -2.91 ( $\pm$ 0.78; < <b>0.001</b> ) |
| Q                       | 1.48 ( $\pm$ 0.23; < <b>0.001</b> )          | 1.35 ( $\pm$ 0.16; < <b>0.001</b> )  | 1.48 ( $\pm$ 0.23; < <b>0.001</b> )                                        | 1.36 ( $\pm$ 0.17; < <b>0.001</b> )  |
| Q + G                   | 1.06 ( $\pm$ 1.12; 0.35)                     | 1.18 ( $\pm$ 0.06; <b>0.002</b> )    | 0.91 ( $\pm$ 1.15; 0.43)                                                   | 0.07 ( $\pm$ 0.06; 0.26)             |
| Q $\times$ G            | -0.26 ( $\pm$ 0.33; 0.44)                    | –                                    | -0.25 ( $\pm$ 0.34; 0.47)                                                  | –                                    |
| Adjusted R <sup>2</sup> | 0.71                                         | 0.71                                 | 0.64                                                                       | 0.65                                 |
| df                      | 38                                           | 39                                   | 38                                                                         | 39                                   |
| F-statistic             | 33.95                                        | 51.14                                | 25.54                                                                      | 38.49                                |
| P-value                 | < 0.001                                      | < 0.001                              | < 0.001                                                                    | < 0.001                              |
